# Supplementary material for: Mapping QTLs for Reproductive Stage Salinity Tolerance in Rice Using a Cross between Hasawi and BRRI dhan28
Source: MDPI journal article supplement (doi:10.3390/ijms231911376), 2022-09-27
Supplement: s1 [file s1]

## Supplementary Materials

**Supplementary Table S1. Descriptive Statistics of the BC<sub>1</sub>F<sub>2</sub> Progenies of Hasawi x BRR1 dhan28 under No-stress and Salinity Stress at Reproductive Stage of Rice.**

| Traits                                | Parents       |             | BC <sub>1</sub> F <sub>2</sub> Progenies of <u>Hasawi</u> x <u>BRR1 dhan28</u> |           |          |       |           |          |           | Decrease Sensitive over Tolerant (%) |
|---------------------------------------|---------------|-------------|--------------------------------------------------------------------------------|-----------|----------|-------|-----------|----------|-----------|--------------------------------------|
|                                       | <u>Hasawi</u> | BRR1 dhan28 | Mean                                                                           | Range     | Skewness | SE    | No-Stress | Tolerant | Sensitive |                                      |
| Plant Height (cm)                     | 124           | 90          | 102.02                                                                         | 37-180    | 0.36     | 1.61  | -         | 116.31   | 98.27     | 15.51                                |
| Productive Tillers/plant              | 18            | 25          | 12.65                                                                          | 1 - 39    | 0.44     | 0.33  | -         | 17.53    | 10.49     | 40.14                                |
| Filled <u>Spikelets/plant</u>         | 1708          | 2349        | 307.59                                                                         | 0-2115    | 1.89     | 16.54 | 637.48    | 735.72   | 123.59    | 83.20                                |
| Unfilled <u>Spikelets/plant</u>       | 436           | 617         | 633.4                                                                          | 17-3316   | 1.40     | 25.39 | 448.87    | 793.55   | 592.84    | 25.29                                |
| Filled <u>Spikelets</u> (%)           | 79.66         | 79.2        | 29.36                                                                          | 0-84.7    | 0.42     | 0.95  | 59.14     | 49.69    | 20.64     | 58.46                                |
| Grain Yield (g/plant)                 | 47.97         | 54.98       | 5.85                                                                           | 0-43.49   | 2.11     | 0.34  | 16.48     | 15.06    | 2.13      | 85.85                                |
| Na <sup>+</sup> -K <sup>+</sup> Ratio | 1.927         | 3.105       | 0.86                                                                           | 0.03-14.5 | 4.46     | 0.08  | -         | 0.52     | 1.18      | -128.56                              |

Note: Mean, range, skewness, and standard error (SE) are based on 435 BC<sub>1</sub>F<sub>2</sub> individuals grown under salinity stress at the reproductive stage; averages are also shown for a set of 153 BC<sub>1</sub>F<sub>2</sub> individuals grown under non-stress control conditions ("no-stress"), along with subsets of BC<sub>1</sub>F<sub>2</sub> individuals grown under salinity stress categorized as "tolerant" or "sensitive" by SES scores and grain weight per plant.

**Supplementary Table S2. Comparison of Agronomic and Physiological Parameters of the BC<sub>1</sub>F<sub>2</sub> Genotypes of Hasawi x BRR1 dhan28 under No-stress and Salinity Stress at Reproductive Stage of Rice (values with the same letter in a column are not significantly different at 5% level of significance).**

| Treatment                 | BC <sub>1</sub> F <sub>2</sub> Genotypes/ Progenies | Plant Height (cm)  | Productive Tillers (no/plant) | Filled <u>Spikelets</u> (no/plant) | Unfilled <u>Spikelets</u> (no/plant) | Filled <u>Spikelets</u> (%) | Unfilled <u>Spikelets</u> (%) | Grain Yield (g/plant) | Na-K Ratio        |
|---------------------------|-----------------------------------------------------|--------------------|-------------------------------|------------------------------------|--------------------------------------|-----------------------------|-------------------------------|-----------------------|-------------------|
| <b>Selected Genotypes</b> |                                                     |                    |                               |                                    |                                      |                             |                               |                       |                   |
| No-Stress                 | Control                                             | -                  | -                             | 637.5 <sup>a</sup>                 | 448.9 <sup>c</sup>                   | 59.1 <sup>a</sup>           | 40.9 <sup>c</sup>             | 16.5 <sup>a</sup>     | -                 |
| Salinity- Stress          | Tolerant                                            | 116.3 <sup>a</sup> | 17.5 <sup>a</sup>             | 735.7 <sup>a</sup>                 | 793.6 <sup>a</sup>                   | 49.7 <sup>b</sup>           | 50.3 <sup>b</sup>             | 15.1 <sup>a</sup>     | 0.52 <sup>b</sup> |
|                           | Sensitive                                           | 98.3 <sup>b</sup>  | 10.5 <sup>b</sup>             | 123.6 <sup>b</sup>                 | 592.9 <sup>b</sup>                   | 20.6 <sup>c</sup>           | 79.4 <sup>a</sup>             | 2.1 <sup>b</sup>      | 1.18 <sup>a</sup> |
| HSD 0.05                  | Tolerant vs Sensitive                               | 9.52               | 1.79                          | 125.19                             | 159.79                               | 5.65                        | 5.65                          | 3.32                  | 0.55              |
|                           | Control vs Tolerant                                 |                    |                               | 118.10                             | 151.65                               | 5.33                        | 5.33                          | 3.13                  |                   |
|                           | Control vs Sensitive                                |                    |                               | 105.56                             | 135.75                               | 4.77                        | 4.77                          | 2.80                  |                   |
| <b>All Genotypes</b>      |                                                     |                    |                               |                                    |                                      |                             |                               |                       |                   |
| No-Stress (N)             |                                                     | -                  | -                             | 637.5 <sup>A</sup>                 | 448.9 <sup>A</sup>                   | 59.1 <sup>A</sup>           | 40.9 <sup>B</sup>             | 16.5 <sup>A</sup>     | -                 |
| Salinity Stress (S)       |                                                     | 102                | 12.7                          | 307.6 <sup>B</sup>                 | 633.4 <sup>B</sup>                   | 29.4 <sup>B</sup>           | 70.6 <sup>A</sup>             | 5.9 <sup>B</sup>      | -                 |
| HSD 0.05                  |                                                     |                    |                               | 69.90                              | 90.74                                | 3.51                        | 3.51                          | 1.66                  |                   |

Note: For All Genotypes, 153 progenies of BC<sub>1</sub>F<sub>2</sub> population were grown under no-stress/control condition and 435 progenies were grown under salinity stress of EC 10 dS/m; and for Selective Genotypes, number of tolerant and sensitives progenies were 78 and 112, respectively grown under salinity stress of EC 10 dS/m at reproductive stage of rice.

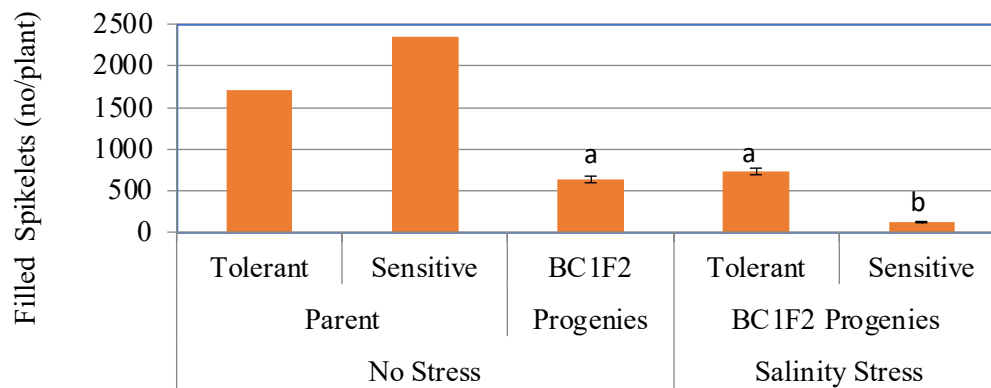

**Supplementary Figure S1.** Number of filled spikelets per plant of tolerant and sensitive parents under non-stress conditions and their BC<sub>1</sub>F<sub>2</sub> progenies under non-stress and salt stress conditions. Vertical and capped bars indicate standard error of the mean number of filled spikelets of 153 plants under no-stress, and 78 tolerant and 112 sensitive progenies grown under salinity stress. Values with the same letter are not significantly different at 5% level of significance.

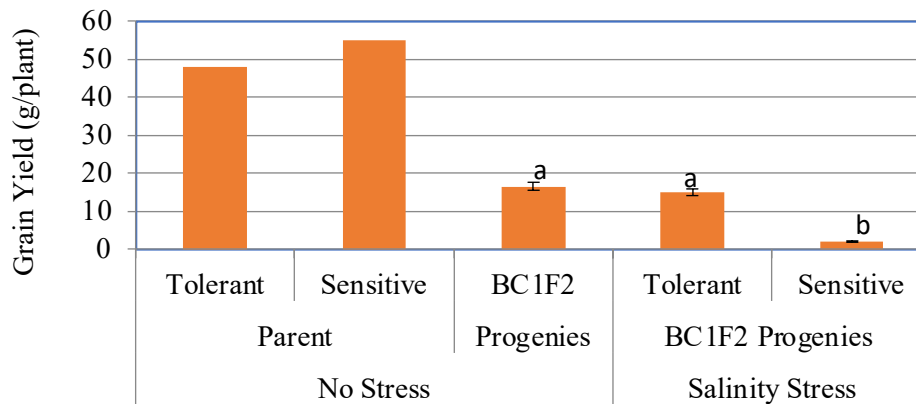

**Supplementary Figure S2.** Grain yield of tolerant and sensitive parents under non-stress conditions and their BC<sub>1</sub>F<sub>2</sub> progenies of Hasawi x BRR1 dhan28 under non-stress and salinity salt stress conditions. Vertical and capped bars indicate standard error of the mean grain yield of 153 progenies under no stress, and 78 tolerant and 112 sensitive progenies grown under salinity stress. Values with the same letter are not significantly different at 5% level of significance.
